# Supplementary material for: Pigment Epithelium-Derived Factor: Inhibition of Phosphorylation of Insulin Receptor (IR)/IR Substrate (IRS), Osteogeneration from Adipocytes, and Increased Levels Due to Doxorubicin Exposure
Source: MDPI journal article supplement (doi:10.3390/pharmaceutics15071960), 2023-07-15
Supplement: s1 [file s1]

## Supplementary Figure S1.

**a**

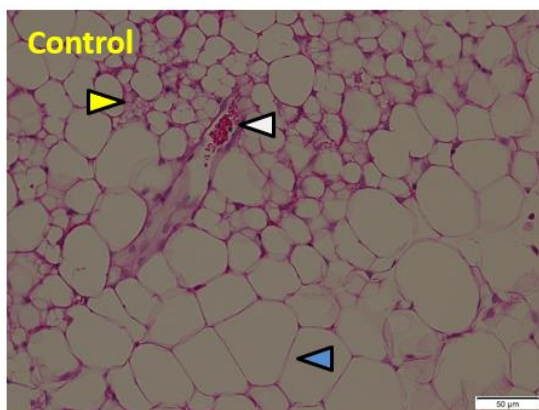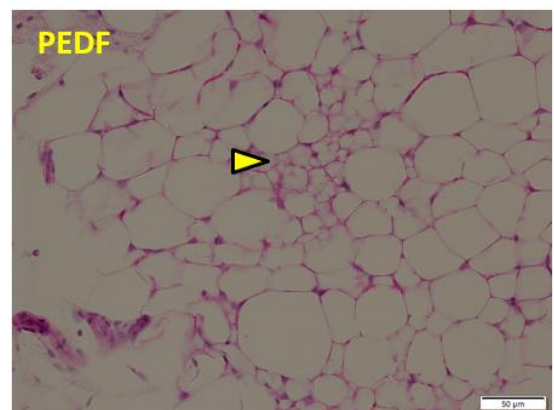

**WAT**

**b**

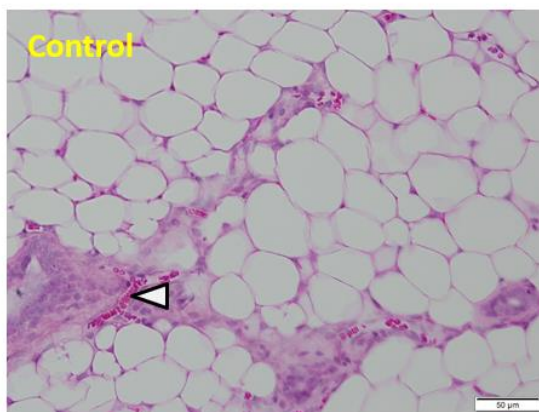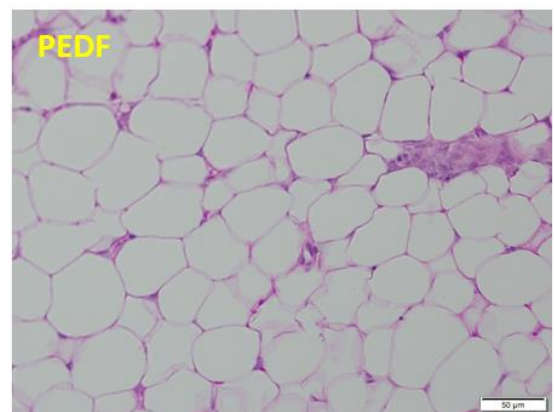

**BAT**

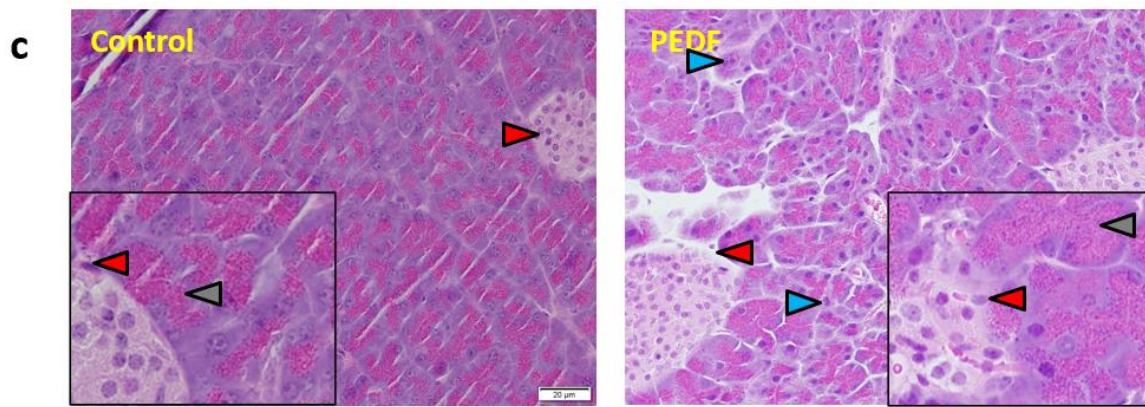

**Pancreas**

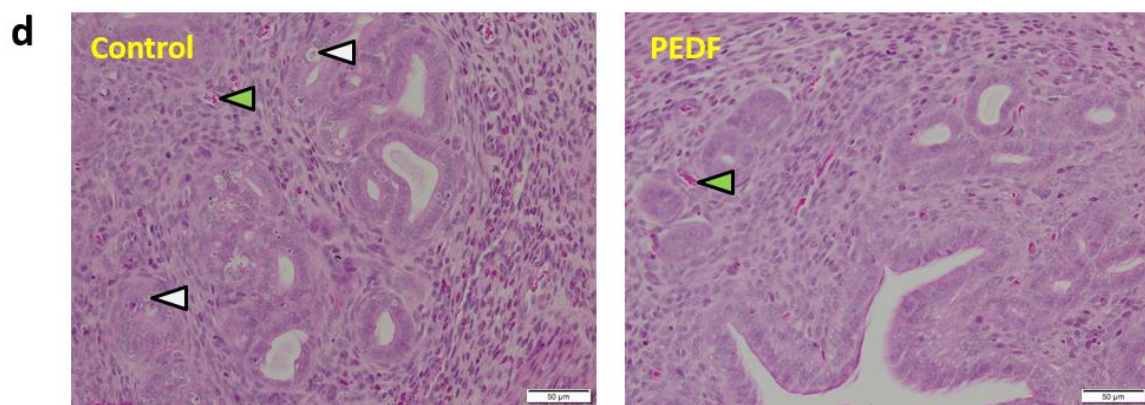

**Small intestine**

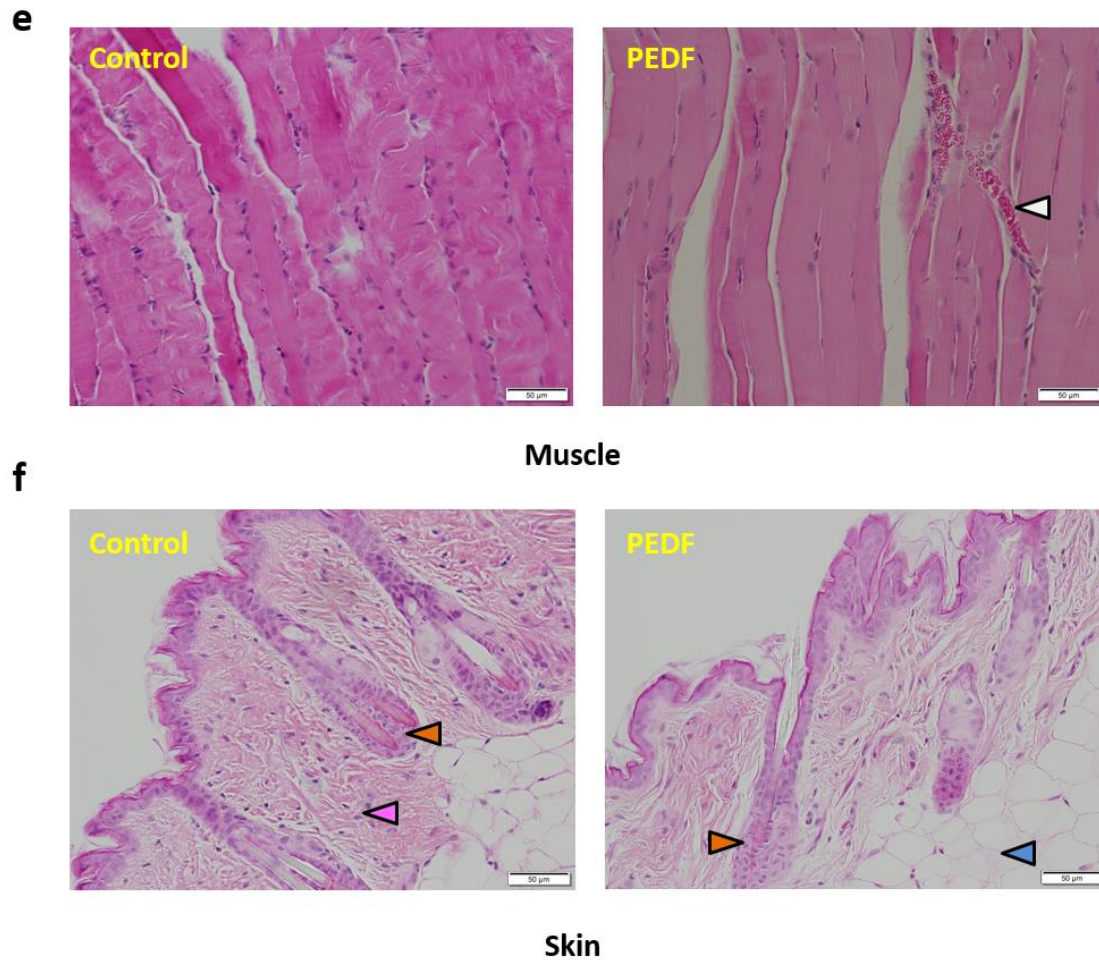

**Supplementary Figure S1. PEDF is able to transdifferentiate adipose cells to bone tissue.**

(a). Photomicrographs of the white adipose tissue (WAT) showing less blood vessels in the PEDF cohort. *Arrowheads: white*, blood vessel; *yellow*, Gelfoam implant remnant; *blue*, adipose tissue. (b). Photomicrographs of the brown adipose tissue (BAT) showing less blood vessels in the PEDF cohort. *Arrowheads: white*, blood vessel. (c). Photomicrographs of the pancreatic islet of Langerhans which appear to change around the boundary in the PEDF cohort. *Arrowheads: red*, islet of Langerhans; *grey*, exocrine secretory acini; *blue*, mitotic cells. (d). Photomicrographs of the small intestine showing nil differences between the cohorts. *Arrowheads: white*, goblet cell; *green*, blood vessel. (e). Photomicrographs of the skeletal muscle showing nil differences between the cohorts. *Arrowhead*, healthy blood vessel in the PEDF cohort. (f). Photomicrographs of the skin showing nil differences between the cohorts. *Arrowheads: orange*, hair follicle; *pink*, underlying dermal layer; *blue*, adipose tissue. *Scale bar* = 50 µm. *n* = 8 mice/group.
